# Supplementary material for: Use of complementary therapies and supportive measures of patients with intracranial gliomas—a prospective evaluation in an outpatient clinic
Source: Springer Nature journal article supplement (doi:10.1007/s11060-024-04696-1), 2024-05-06
Supplement: MOESM1 [file 27060920]

| No. | Question                                                                                        | Answer options                                                                                                                          |
|-----|-------------------------------------------------------------------------------------------------|-----------------------------------------------------------------------------------------------------------------------------------------|
| 1.  | Are you male or female                                                                          | Male, female                                                                                                                            |
| 2.  | How old are you?                                                                                |                                                                                                                                         |
| 3.  | What is your Diagnosis?                                                                         | Glioblastoma, Anaplastic Astrocytoma, Anaplastic Oligo, other                                                                           |
| 4.  | Do you know any other molecular pathological details of your disease?                           | MGMT, 1p19q, IDH, ATRX, none                                                                                                            |
| 5.  | Where do you get information about the disease and treatment options?                           | Neurosurgeon, Oncologist, Neurologist, Internet, Support-Group, alternative Practitioner, general Practitioner, other                   |
| 6.  | What do you use against tumor growth independently of the recommendations of your neurosurgeon? | Nutrition, diet, sports program, food supplements, additional medication, alternative therapies, none, others                           |
| 7.  | Which of the following topics would you like to learn more about during your treatment?         | Current trials, Support-Groups, sports, nutrition/diet, alternative therapies, psychological support, other, I am sufficiently informed |
| 8.  | Did you get a second opinion during your treatment?                                             | Yes Neurosurgeon, Yes Oncologist, Yes Neurologist, Yes alternative Practitioner, No                                                     |
| 9.  | Were you informed about current studies and the possibility of participating in them?           | Yes - by the doctors, Yes – by my own research, No                                                                                      |
| 10. | Could you imagine participating in a study?                                                     | Yes – if the risk stays the same, Yes - even if the risk increases, No                                                                  |

### Questions asked in the survey
